# Supplementary material
Source: HighWire-hosted journal article supplement (https://ijgc.bmj.com/content/ijgc-2020-001683)
Supplement: inline-supplementary-material-2 [file inline-supplementary-material-2.pdf]

**Survey instrument for adoption of enhanced recovery after laparotomy in gynecologic oncology**

**General Questions**

1. Please select the category that best describes you:
  - a. Gynecologic oncology fellow/resident
  - b. Gynecologic oncologist
  - c. Surg Oncology resident/fellow
  - d. Surg Oncologist
  - e. Radiation oncologist
  - f. Medical oncologist
  - g. Pathologist
  - h. Other
2. Years since completing training: \_\_\_\_\_
3. Do you work with:
 

Obstetrics and gynecology residents?

  - a. Yes
  - b. No

Gynecologic oncology fellows?

  - a. Yes
  - b. No

Surgery residents?

  - c. Yes
  - d. No

Surg oncology fellows?

  - e. Yes
  - f. No
4. Type of Institution
  - a. Academic
  - b. Private
  - c. Private with academic affiliation
  - d. Community
  - e. Military
  - f. Other
5. State & Country of practice:
6. Number of gynecologic/surgical oncologists in your practice: \_\_\_\_

**Preoperative management**

7. How often do you use bowel preparation for the following situations:

|                                  | Never | Rarely | Sometimes | Often | Always |
|----------------------------------|-------|--------|-----------|-------|--------|
| <b>Laparotomy</b>                |       |        |           |       |        |
| <b>Ovarian cancer debulking</b>  |       |        |           |       |        |
| <b>Concern for bowel surgery</b> |       |        |           |       |        |

8. What type of bowel preparation do you use? (Check all that apply)
  - a. Mechanical

- b. Antibiotic
- c. Enema
- d. Other: \_\_\_\_\_

9. When do you initiate preoperative fasting?

For solids:

- a. ≤6 hours
- b. 6 hours
- c. 6-8 hours
- d. >8 hours

For liquids:

- a. <2 hours
- b. 2 hours
- c. 2-6 hours
- d. >6 hours

10. Do you use carbohydrate loading in your preoperative practice?

- a. Yes
- b. No
- c. Not sure

11. What type of carbohydrate loading do you use? (Check all that apply)

- a. Gatorade
- b. Glucose+water solution
- c. Other (Please specify name)

12. Is pre-operative and intraoperative DVT prophylaxis used in your practice?

- a. Yes
- b. No
- c. Not sure

13. Which of the following drugs do you use as pre-operative and intraoperative DVT prophylaxis? (Check all that apply)

- a. Heparin
- b. Low molecular weight heparin
- c. Fondaparinux
- d. Stockings
- e. Pneumatic compression
- f. Other
- g. None

### Intraoperative Management

14. For the following situations, select how often you use regional pain management

|                                                     | Never | Rarely | Sometimes | Very Often | Always |
|-----------------------------------------------------|-------|--------|-----------|------------|--------|
| <b>Epidural for laparotomy</b>                      |       |        |           |            |        |
| <b>Epidural for laparoscopy</b>                     |       |        |           |            |        |
| <b>Nerve block for laparotomy (i.e. TAP block)</b>  |       |        |           |            |        |
| <b>Nerve block for laparoscopy (i.e. TAP block)</b> |       |        |           |            |        |

15. Does your institution have an intraoperative fluid management protocol for laparotomy?
- Yes, at discretion of anesthesia team
  - Yes, early goal-directed therapy protocol - non-invasive monitoring
  - Yes, early goal-directed therapy protocol - invasive ( i.e. esophageal Doppler)
  - No
  - Not sure

16. Do you routinely use nasogastric or orogastric tube for the following procedures?

|                        | Never | Rarely | Sometimes | Often | Always |
|------------------------|-------|--------|-----------|-------|--------|
| <b>For laparotomy</b>  |       |        |           |       |        |
| <b>For laparoscopy</b> |       |        |           |       |        |

17. When do you leave a nasogastric tube in place postoperatively? (Check all that apply)

- After small bowel resection
- After large bowel resection
- Splenectomy
- Ligation of the short gastric vessels
- Other
- Never

18. Is core temperature measure continuously in your operating room?

- Yes
- No
- Not sure

19. Which of the following are used in your operating room? (Check all that apply)

- Forced air blanket devices
- Underbody warming mattresses
- Warm intravenous fluids
- Other
- None

**Postoperative management**

20. At what rate are fluids administered in the post-operative setting?
- < 40ml/h
  - 40ml/h – 100ml/h
  - > 100 ml/h
  - No IV fluids given
21. When are fluids routinely terminated?
- < 12 hours after surgery
  - 12-24 hours after surgery
  - > 24 hours after surgery
  - When patient tolerating PO
  - Not sure
22. When is a regular diet started routinely after laparotomy?
- < 24 hours after surgery
  - 24 - <48 hours after surgery
  - 48-72 hours after surgery
  - > 72 hours after surgery
  - Not sure
23. Which of the following do you routinely use to hasten return of bowel function
- Milk of magnesia
  - Bisacodyl suppositories
  - Mu opioid antagonists
  - Erythromycin
  - Chewing gum
  - Other
  - I do not use any method to hasten return of bowel function
24. For the following situations, select how often do you use peritoneal drainage

|                            | Never | Rarely | Sometimes | Very Often | Always |
|----------------------------|-------|--------|-----------|------------|--------|
| <b>Lymphadenectomy</b>     |       |        |           |            |        |
| <b>Bowel resection</b>     |       |        |           |            |        |
| <b>Urologic procedures</b> |       |        |           |            |        |
| <b>Splenectomy</b>         |       |        |           |            |        |
| <b>Liver resection</b>     |       |        |           |            |        |

25. Do you use catheterization for urinary drainage post-operatively?
- Yes
  - No
  - Not sure

26. Select when the urinary catheter is most commonly removed after laparotomy.
- < 24 hours
  - 24-48 hours
  - > 48 hours
27. Select when the urinary catheter is most commonly removed after laparoscopy.
- In the OR
  - Postoperative unit
  - Postoperative day 1
  - On or after postoperative day 2
28. Select your method for voiding trials in the following situations

|                    | <b>Routine removal of foley</b> | <b>Back fill voiding trial</b> | <b>Other</b> | <b>None</b> |
|--------------------|---------------------------------|--------------------------------|--------------|-------------|
| <b>Laparotomy</b>  |                                 |                                |              |             |
| <b>Laparoscopy</b> |                                 |                                |              |             |

29. Do your patients receive post-operative DVT prophylaxis?
- Yes
  - No
  - Not sure
30. How long do your patients receive postoperative DVT prophylaxis?

|                             | <b>Less than 1 month</b> | <b>1 month</b> | <b>Longer than 1 month</b> | <b>Only during hospital stay</b> | <b>Not sure</b> |
|-----------------------------|--------------------------|----------------|----------------------------|----------------------------------|-----------------|
| <b>Laparotomy – benign</b>  |                          |                |                            |                                  |                 |
| <b>Laparotomy – cancer</b>  |                          |                |                            |                                  |                 |
| <b>Laparoscopy– benign</b>  |                          |                |                            |                                  |                 |
| <b>Laparoscopy - cancer</b> |                          |                |                            |                                  |                 |

31. Select the average time for mobilization of patients post-operatively
- Day of surgery
  - Post-operative day 1
  - Post-operative day 2 or greater

**Postoperative management strategies**

32. Does your institution have an established enhanced recovery after surgery (ERAS) pathway for laparotomy?
- Yes
  - No
  - Not sure
33. How long has your ERAS protocol been in place?
- < 1 year
  - 1-2 years
  - > 2 years

34. Indicate to what extent you agree with the following statements.

| <b>ERAS:</b>                                 | <b>Strongly Disagree</b> | <b>Disagree</b> | <b>Undecided</b> | <b>Agree Strongly</b> | <b>Agree</b> |
|----------------------------------------------|--------------------------|-----------------|------------------|-----------------------|--------------|
| <b>Improves patient outcomes</b>             |                          |                 |                  |                       |              |
| <b>Improves patient satisfaction</b>         |                          |                 |                  |                       |              |
| <b>Is a safe procedure</b>                   |                          |                 |                  |                       |              |
| <b>Increases complication risk</b>           |                          |                 |                  |                       |              |
| <b>Reduces readmission rate</b>              |                          |                 |                  |                       |              |
| <b>Decreases rate of unscheduled visits</b>  |                          |                 |                  |                       |              |
| <b>It's great but difficult to implement</b> |                          |                 |                  |                       |              |

35. Do you offer same-day discharge to patients undergoing laparoscopy for the following:

|                                                                    | <b>Never</b> | <b>Rarely</b> | <b>Sometimes</b> | <b>Often</b> | <b>Always</b> |
|--------------------------------------------------------------------|--------------|---------------|------------------|--------------|---------------|
| <b>Adnexal surgery</b>                                             |              |               |                  |              |               |
| <b>Hysterectomy + adnexal surgery</b>                              |              |               |                  |              |               |
| <b>Hysterectomy + adnexal surgery + lymphadenectomy ( staging)</b> |              |               |                  |              |               |

36. Which factors influence your decision? (Check all that apply)

- Age
- Comorbidities
- Extent of surgery
- Patient distance from hospital
- Patient social support
- Time of day when surgery is complete
- Other

37. Please select the most common reason for a patient to not achieve same-day discharge?

- Age
- Comorbidities
- Extent of surgery
- Patients distance from hospital
- Patient social support
- Time of day
